# Supplementary material for: Machine learning for the prediction of all-cause mortality in patients with sepsis-associated acute kidney injury during hospitalization
Source: PubMed Central journal article supplement (PMC10106833; doi:10.3389/fimmu.2023.1140755), 2023-04-03

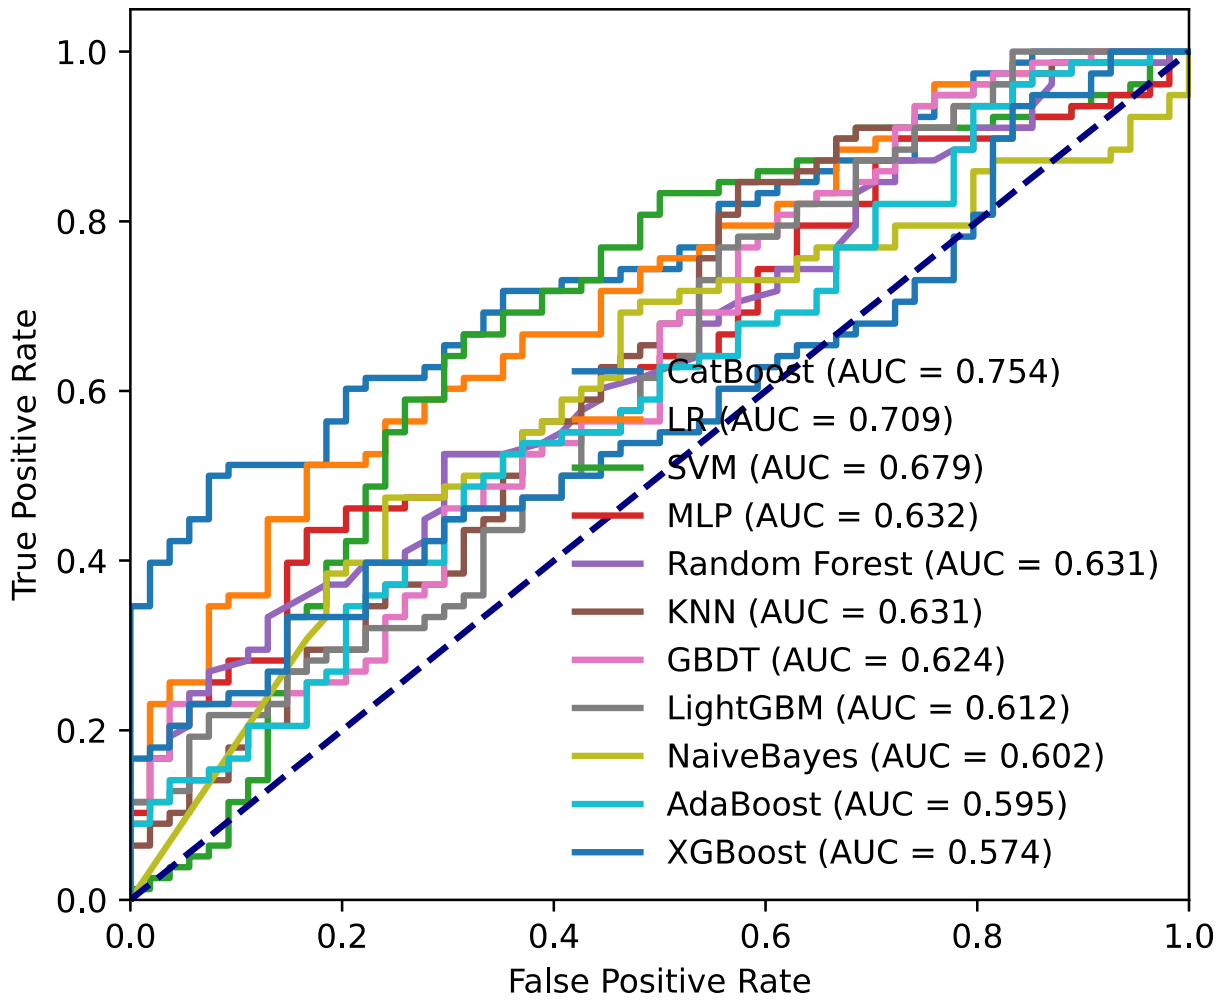

Supplement: DataSheet_2.pdf [file DataSheet_2.pdf]
