# Supplementary material for: Machine learning for the prediction of all-cause mortality in patients with sepsis-associated acute kidney injury during hospitalization
Source: PubMed Central journal article supplement (PMC10106833; doi:10.3389/fimmu.2023.1140755), 2023-04-03

### Train ROC Curve

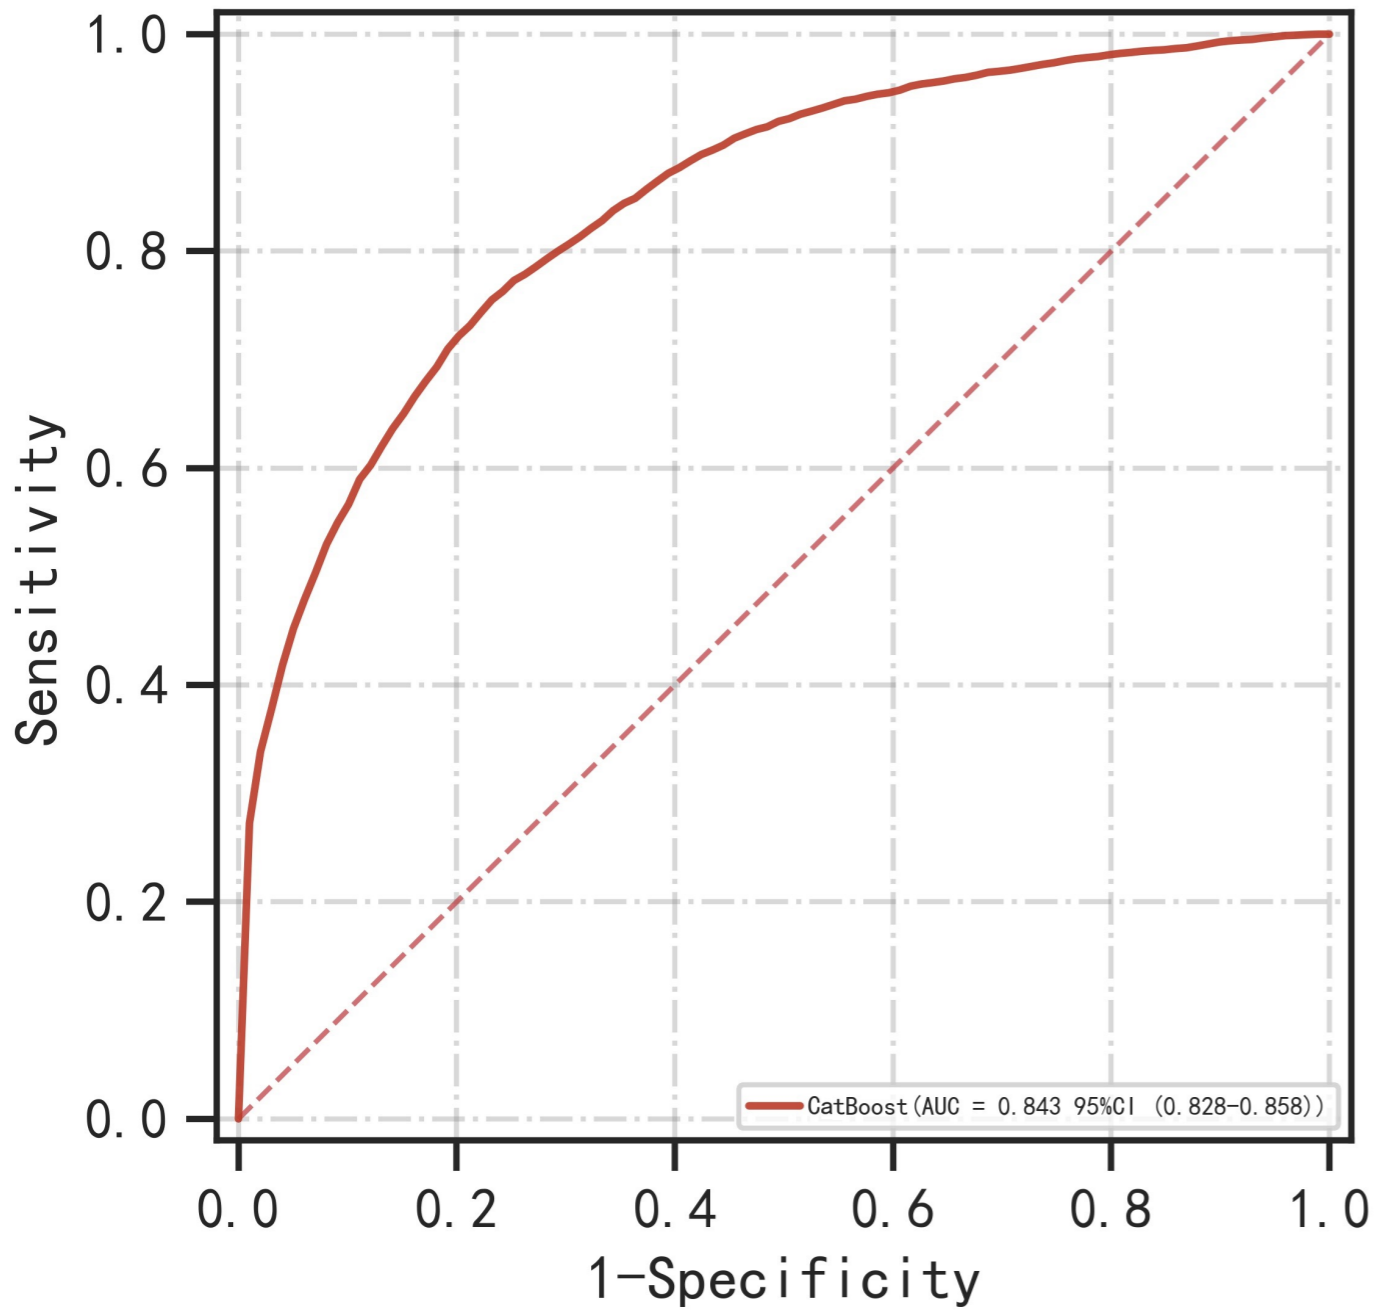

### Validation ROC Curve

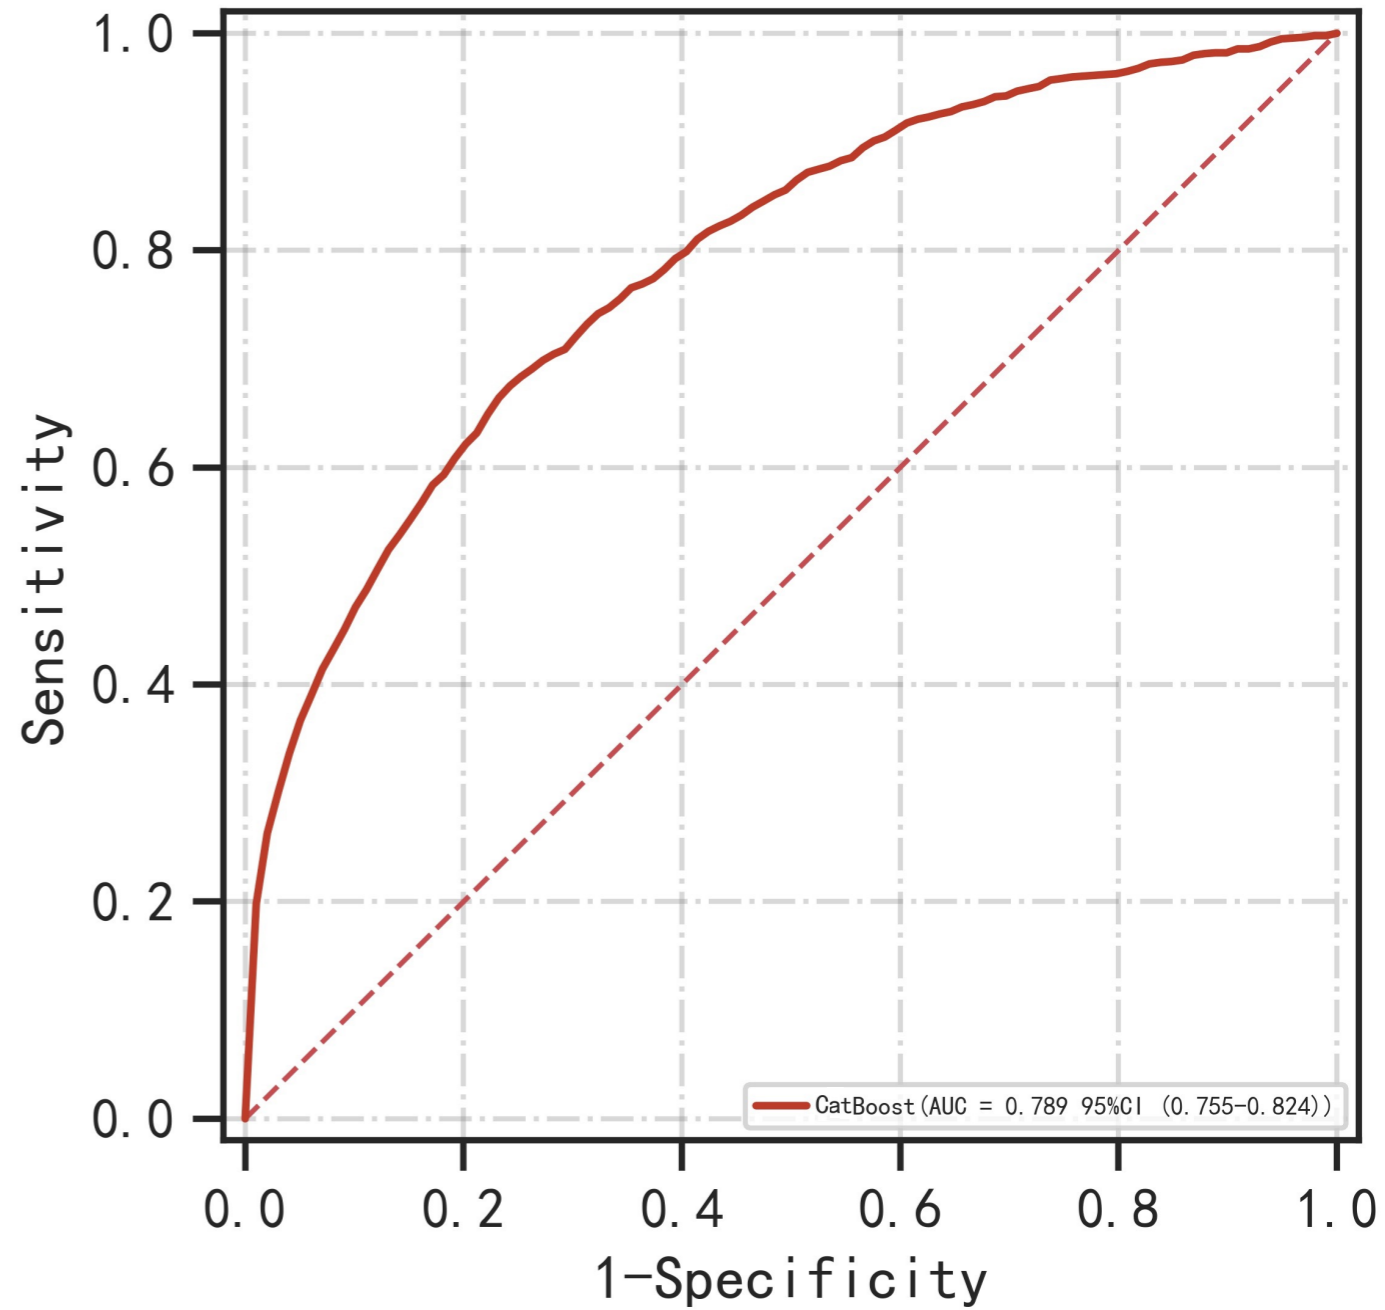

Supplement: DataSheet_4.pdf [file DataSheet_4.pdf]
