# Supplementary material for: Machine learning for the prediction of all-cause mortality in patients with sepsis-associated acute kidney injury during hospitalization
Source: PubMed Central journal article supplement (PMC10106833; doi:10.3389/fimmu.2023.1140755), 2023-04-03
Supplement: DataSheet_5.pdf [file DataSheet_5.pdf]

| Varibale                     |   | All         | Alive group | death group |
|------------------------------|---|-------------|-------------|-------------|
| n                            |   | 132         | 54          | 78          |
| Age,mean(SD)                 |   | 56.7 (16.1) | 56.0 (16.8) | 57.5 (15.7) |
| Gender, n (%)                | F | 44(33.3)    | 14 (25.9)   | 30 (38.5)   |
|                              | M | 88(66.7)    | 40 (74.1)   | 48 (61.5)   |
| Liver disease, n (%)         | 1 | 29 (22.0)   | 9 (16.7)    | 20 (25.6)   |
| Cardiovascular events, n (%) | 1 | 25 (18.9)   | 5 (9.3)     | 20 (25.6)   |
| Stroke,n (%)                 | 1 | 12(9.1)     | 6(11.1)     | 6(7.7)      |
| diabetes                     | 1 | 19(14.4)    | 10(18.5)    | 9(11.5)     |
